# Supplementary material for: A novel topotactic transformation route towards monodispersed YOF:Ln3+ (Ln = Eu, Tb, Yb/Er, Yb/Tm) microcrystals with multicolor emissions
Source: Royal Society of Chemistry journal article supplement (doi:10.1039/c8tc03239d), 2018-01-01
Supplement: c8tc03239d1.pdf [file c8tc03239d1.pdf]

# Novel Topotactic Transformation Route Towards Monodisperse YOF:Ln<sup>3+</sup> (Ln=Eu, Tb, Yb/Er, Yb/Tm) Microcrystals with Multicolor Emissions

Senwen Yuan,<sup>a</sup> Baiqi Shao,<sup>\*a</sup> Yang Feng,<sup>a,b</sup> Shuang Zhao,<sup>a,b</sup> Jiansheng Huo,<sup>a,b</sup> Langping Dong,<sup>a,b</sup> and Hongpeng You<sup>\*a</sup>

<sup>a</sup>State Key Laboratory of Rare Earth Resource Utilization, Changchun Institute of Applied Chemistry, Chinese Academy of Sciences, Changchun 130022,

<sup>b</sup>University of the Science and Technology of China, Hefei 230026, P. R. China

**Synthesis of Y(OH)<sub>3</sub> Micro Hexagonal prisms.** NaOH solution (2M) was added into 35 mL aqueous mixture containing 0.25 mmol Y<sub>4</sub>O(OH)<sub>9</sub>NO<sub>3</sub> until the pH value was 12. After stirring for 10 min, the mixture was sealed in 50 mL Teflon-lined autoclave and maintained at 200 °C for 12 h. After the reaction was finished, the white products were collected and washed with deionized water and absolute ethanol twice in turn, and air dried at 60 °C overnight.

**Synthesis of β-NaYF<sub>4</sub> Micro Hexagonal Bundles.** 30 mL aqueous solution containing 30 mmol NaF was added into 10 mL aqueous mixture containing 0.25 mmol Y<sub>4</sub>O(OH)<sub>9</sub>NO<sub>3</sub>. After stirring for 10 min, the mixture was sealed in 50 mL Teflon-lined autoclave and maintained at 180 °C for 12 h. After the reaction was finished, the white products were collected and washed with deionized water and absolute ethanol twice in turn, and air dried at 60 °C overnight.

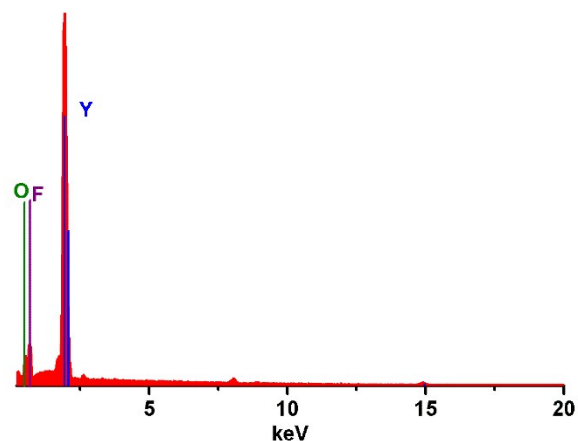

**Figure S1.** EDS patter of the  $\text{Y(OH)}_{2.02}\text{F}_{0.98}$  intermediate product. The peak at about 8 keV comes from the Cu substrate.

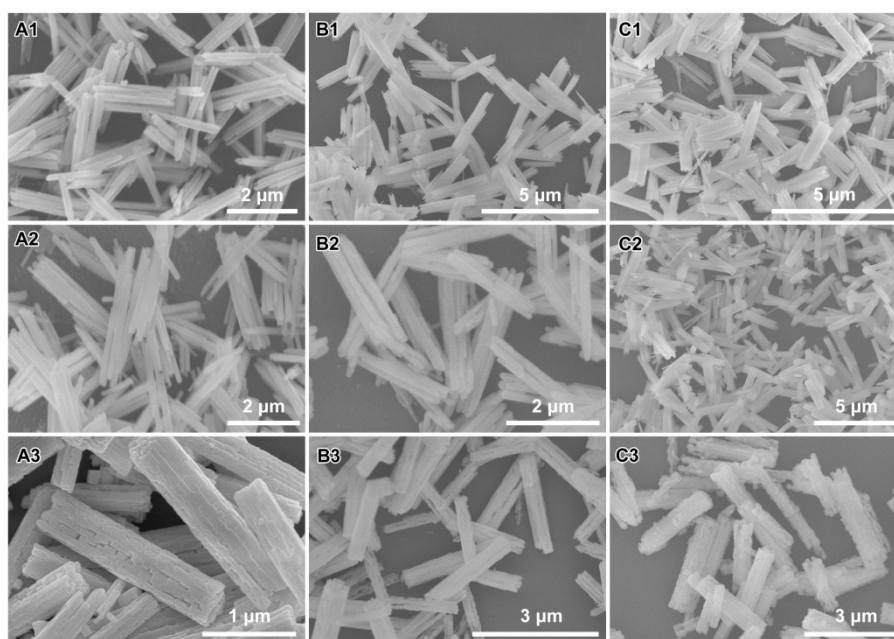

**Figure S2.** SEM images of the final products with different  $\text{NaF-Y}_4\text{O(OH)}_9\text{NO}_3$  feeding ratios (row) and reaction temperature (column).  $\text{NaF-Y}_4\text{O(OH)}_9\text{NO}_3$  feeding ratio in Row1 is 5-0.25, in Row2 is 10-0.25, and in Row3 is 20-0.25; reaction temperature in column A is 120 °C, in column B is 150 °C, and in column C is 180 °C.

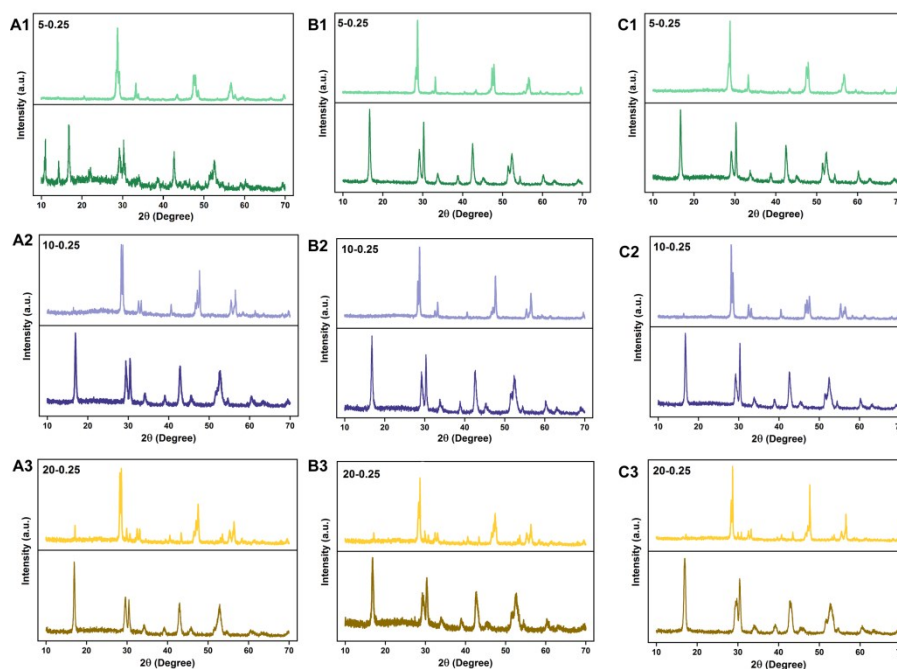

**Figure S3.** XRD patterns of the intermediate products and the final product with different NaF- $\text{Y}_4\text{O}(\text{OH})_9\text{NO}_3$  Feeding Ratios (row) and Temperature (column). In each panel, the lower part is the intermediate product, and the upper part is the final product. NaF- $\text{Y}_4\text{O}(\text{OH})_9\text{NO}_3$  feeding ratio in Row1 is 5-0.25, in Row2 is 10-0.25, and in Row3 is 20-0.25; reaction temperature in column A is 120 °C, in column B is 150 °C, and in column C is 180 °C.

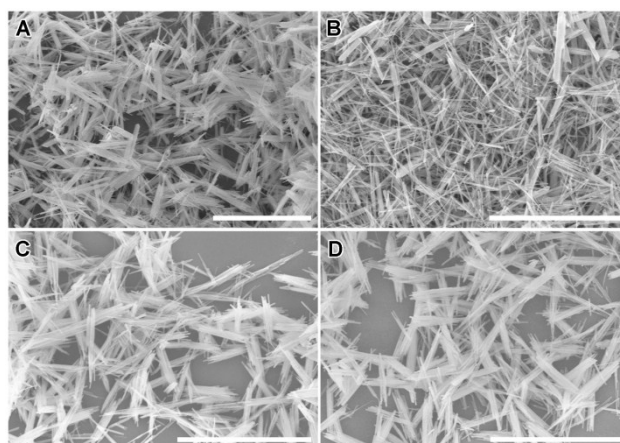

**Figure S4.** SEM images of the final products with different  $\text{NH}_4\text{F}-\text{Y}_4\text{O}(\text{OH})_9\text{NO}_3$  feeding ratios (A) 0.5-0.25, (B) 1-0.25, (C) 1.5-0.25, and (D) 2-0.25. The scale bars are 5  $\mu\text{m}$ .

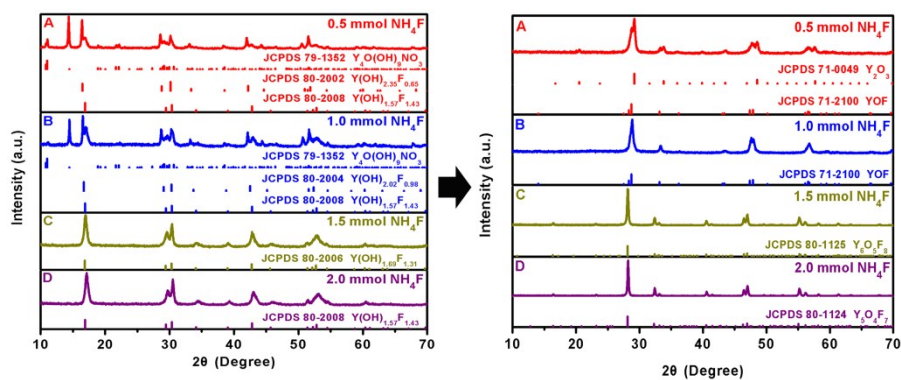

**Figure S5.** The XRD patterns of the intermediate products (left panel) and the final product (right panel) with different  $\text{NH}_4\text{F}$ - $\text{Y}_4\text{O}(\text{OH})_9\text{NO}_3$  feeding ratios (A) 0.5-0.25, (B) 1-0.25, (C) 1.5-0.25, and (D) 2-0.25.
